# Supplementary material for: A Network Flow Approach to Predict Protein Targets and Flavonoid Backbones to Treat Respiratory Syncytial Virus Infection
Source: Biomed Res Int. 2015 Mar 22;2015:301635. doi: 10.1155/2015/301635 (PMC4386546; doi:10.1155/2015/301635)
Supplement: Supplementary file 1 — Supplementary figure 1: All PPI networks obtained in this work. PPI network was obtained from microarrays data of PHBE cells infected with RSV, and flavonoid compounds, as initial input of STITCH software. Supplementary Table 1: All gene ontologies obtanied from major PPI network through. Supplementary Table 2: CentiScape Analysis. (a) Degree, betweeness and closeness centrality scores of each node in RSV CP-PPI network. (b) Hub (H) and bottlenecks (B) nodes are showed with their closeness values. [file 301635.f1.zip › Suppl Table 1.xls]

## Sheet: Sheet1
File created with BiNGO (c)
CLUSTER 1
ontology: namespace
curator: bingo
Selected ontology file : jar:file:C:\Users\Jose\.cytoscape\2.8\plugins\BiNGO-2.44\BiNGO.jar!/GO_Biological_Process
Selected annotation file : jar:file:C:\Users\Jose\.cytoscape\2.8\plugins\BiNGO-2.44\BiNGO.jar!/H_sapiens_default
Discarded evidence codes :
Overrepresentation
Selected statistical test : Hypergeometric test
Selected correction : Benjamini & Hochberg False Discovery Rate (FDR) correction
Selected significance level : 0.05
Testing option : Use whole annotation as reference set
The selected cluster :
EXO1	C9ORF100	KIF2C	CDCA8	BIRC5	AURKB	RRM2B	KPNA2
No annotations were retrieved for the following entities:
GO-ID	p-value	corr p-value	x	n	X	N	Description	Genes in test set
279	5.6175E-9	1.2920E-6	6	351	8	14306	M phase	EXO1|KIF2C|CDCA8|BIRC5|AURKB|KPNA2
22403	2.0313E-8	2.3360E-6	6	435	8	14306	cell cycle phase	EXO1|KIF2C|CDCA8|BIRC5|AURKB|KPNA2
22402	1.1543E-7	8.8494E-6	6	582	8	14306	cell cycle process	EXO1|KIF2C|CDCA8|BIRC5|AURKB|KPNA2
278	6.7542E-7	3.3570E-5	5	380	8	14306	mitotic cell cycle	KIF2C|CDCA8|BIRC5|AURKB|KPNA2
7049	7.2979E-7	3.3570E-5	6	794	8	14306	cell cycle	EXO1|KIF2C|CDCA8|BIRC5|AURKB|KPNA2
7067	4.4832E-6	1.3327E-4	4	232	8	14306	mitosis	KIF2C|CDCA8|BIRC5|AURKB
280	4.4832E-6	1.3327E-4	4	232	8	14306	nuclear division	KIF2C|CDCA8|BIRC5|AURKB
87	5.0451E-6	1.3327E-4	4	239	8	14306	M phase of mitotic cell cycle	KIF2C|CDCA8|BIRC5|AURKB
48285	5.2149E-6	1.3327E-4	4	241	8	14306	organelle fission	KIF2C|CDCA8|BIRC5|AURKB
51301	1.4868E-5	3.4195E-4	4	314	8	14306	cell division	KIF2C|CDCA8|BIRC5|AURKB
910	3.0472E-4	6.3714E-3	2	48	8	14306	cytokinesis	BIRC5|AURKB
6996	3.6442E-4	6.9846E-3	5	1382	8	14306	organelle organization	KIF2C|CDCA8|BIRC5|RRM2B|AURKB
72	1.1181E-3	1.8369E-2	1	2	8	14306	M phase specific microtubule process	KPNA2
30951	1.1181E-3	1.8369E-2	1	2	8	14306	establishment or maintenance of microtubule cytoskeleton polarity	KIF2C
51329	1.3706E-3	2.1016E-2	2	102	8	14306	interphase of mitotic cell cycle	BIRC5|KPNA2
51325	1.4791E-3	2.1262E-2	2	106	8	14306	interphase	BIRC5|KPNA2
30952	1.6768E-3	2.2686E-2	1	3	8	14306	establishment or maintenance of cytoskeleton polarity	KIF2C
89	2.2352E-3	2.3981E-2	1	4	8	14306	mitotic metaphase	CDCA8
31536	2.2352E-3	2.3981E-2	1	4	8	14306	positive regulation of exit from mitosis	BIRC5
7019	2.2352E-3	2.3981E-2	1	4	8	14306	microtubule depolymerization	KIF2C
9186	2.2352E-3	2.3981E-2	1	4	8	14306	deoxyribonucleoside diphosphate metabolic process	RRM2B
6259	2.2938E-3	2.3981E-2	3	517	8	14306	DNA metabolic process	EXO1|RRM2B|KPNA2
51261	2.7933E-3	2.6769E-2	1	5	8	14306	protein depolymerization	KIF2C
34501	2.7933E-3	2.6769E-2	1	5	8	14306	protein localization to kinetochore	AURKB
51323	3.3511E-3	2.9000E-2	1	6	8	14306	metaphase	CDCA8
6264	3.3511E-3	2.9000E-2	1	6	8	14306	mitochondrial DNA replication	RRM2B
32042	3.9087E-3	2.9000E-2	1	7	8	14306	mitochondrial DNA metabolic process	RRM2B
85	3.9087E-3	2.9000E-2	1	7	8	14306	G2 phase of mitotic cell cycle	KPNA2
2566	3.9087E-3	2.9000E-2	1	7	8	14306	somatic diversification of immune receptors via somatic mutation	EXO1
16446	3.9087E-3	2.9000E-2	1	7	8	14306	somatic hypermutation of immunoglobulin genes	EXO1
51319	3.9087E-3	2.9000E-2	1	7	8	14306	G2 phase	KPNA2
9263	4.4660E-3	3.0211E-2	1	8	8	14306	deoxyribonucleotide biosynthetic process	RRM2B
31503	4.4660E-3	3.0211E-2	1	8	8	14306	protein complex localization	BIRC5
31109	4.4660E-3	3.0211E-2	1	8	8	14306	microtubule polymerization or depolymerization	KIF2C
9200	5.0230E-3	3.3008E-2	1	9	8	14306	deoxyribonucleoside triphosphate metabolic process	RRM2B
2	5.5798E-3	3.4685E-2	1	10	8	14306	mitochondrial genome maintenance	RRM2B
51983	5.5798E-3	3.4685E-2	1	10	8	14306	regulation of chromosome segregation	KIF2C
2204	6.1362E-3	3.5283E-2	1	11	8	14306	somatic recombination of immunoglobulin genes involved in immune response	EXO1
2208	6.1362E-3	3.5283E-2	1	11	8	14306	somatic diversification of immunoglobulins involved in immune response	EXO1
45190	6.1362E-3	3.5283E-2	1	11	8	14306	isotype switching	EXO1
16043	6.3649E-3	3.5705E-2	5	2563	8	14306	cellular component organization	KIF2C|CDCA8|BIRC5|RRM2B|AURKB
7096	6.6924E-3	3.5797E-2	1	12	8	14306	regulation of exit from mitosis	BIRC5
2381	6.6924E-3	3.5797E-2	1	12	8	14306	immunoglobulin production involved in immunoglobulin mediated immune response	EXO1
6607	7.2484E-3	3.7889E-2	1	13	8	14306	NLS-bearing substrate import into nucleus	KPNA2
7017	7.7618E-3	3.9020E-2	2	247	8	14306	microtubule-based process	KIF2C|KPNA2
31577	7.8040E-3	3.9020E-2	1	14	8	14306	spindle checkpoint	BIRC5
9132	8.3594E-3	4.0908E-2	1	15	8	14306	nucleoside diphosphate metabolic process	RRM2B
16447	8.9145E-3	4.1884E-2	1	16	8	14306	somatic recombination of immunoglobulin gene segments	EXO1
50000	9.4694E-3	4.1884E-2	1	17	8	14306	chromosome localization	BIRC5
43241	9.4694E-3	4.1884E-2	1	17	8	14306	protein complex disassembly	KIF2C
51303	9.4694E-3	4.1884E-2	1	17	8	14306	establishment of chromosome localization	BIRC5
43624	9.4694E-3	4.1884E-2	1	17	8	14306	cellular protein complex disassembly	KIF2C
16445	1.0578E-2	4.5906E-2	1	19	8	14306	somatic diversification of immunoglobulins	EXO1
6281	1.1289E-2	4.6918E-2	2	300	8	14306	DNA repair	EXO1|RRM2B
86	1.1686E-2	4.6918E-2	1	21	8	14306	G2/M transition of mitotic cell cycle	BIRC5
45931	1.1686E-2	4.6918E-2	1	21	8	14306	positive regulation of mitotic cell cycle	BIRC5
43154	1.1686E-2	4.6918E-2	1	21	8	14306	negative regulation of caspase activity	BIRC5
2562	1.2239E-2	4.6918E-2	1	22	8	14306	somatic diversification of immune receptors via germline recombination within a single locus	EXO1
16444	1.2239E-2	4.6918E-2	1	22	8	14306	somatic cell DNA recombination	EXO1
6298	1.2239E-2	4.6918E-2	1	22	8	14306	mismatch repair	EXO1

## Sheet: Sheet2
File created with BiNGO (c)
CLUSTER 2
ontology: namespace
curator: bingo
Selected ontology file : jar:file:C:\Users\Jose\.cytoscape\2.8\plugins\BiNGO-2.44\BiNGO.jar!/GO_Biological_Process
Selected annotation file : jar:file:C:\Users\Jose\.cytoscape\2.8\plugins\BiNGO-2.44\BiNGO.jar!/H_sapiens_default
Discarded evidence codes :
Overrepresentation
Selected statistical test : Hypergeometric test
Selected correction : Benjamini & Hochberg False Discovery Rate (FDR) correction
Selected significance level : 0.05
Testing option : Use whole annotation as reference set
The selected cluster :
PSMF1	FBXW2	FBXL7	SKP1	RBX1
No annotations were retrieved for the following entities:
GO-ID	p-value	corr p-value	x	n	X	N	Description	Genes in test set
6508	3.4148E-7	1.6193E-5	5	730	5	14306	proteolysis	PSMF1|FBXW2|FBXL7|SKP1|RBX1
6511	6.7744E-7	1.6193E-5	4	277	5	14306	ubiquitin-dependent protein catabolic process	PSMF1|FBXL7|SKP1|RBX1
43632	7.2776E-7	1.6193E-5	4	282	5	14306	modification-dependent macromolecule catabolic process	PSMF1|FBXL7|SKP1|RBX1
19941	7.2776E-7	1.6193E-5	4	282	5	14306	modification-dependent protein catabolic process	PSMF1|FBXL7|SKP1|RBX1
51603	1.0769E-6	1.6600E-5	4	311	5	14306	proteolysis involved in cellular protein catabolic process	PSMF1|FBXL7|SKP1|RBX1
44257	1.1191E-6	1.6600E-5	4	314	5	14306	cellular protein catabolic process	PSMF1|FBXL7|SKP1|RBX1
30163	1.5204E-6	1.9330E-5	4	339	5	14306	protein catabolic process	PSMF1|FBXL7|SKP1|RBX1
44265	4.3467E-6	4.8357E-5	4	441	5	14306	cellular macromolecule catabolic process	PSMF1|FBXL7|SKP1|RBX1
31146	5.3683E-6	5.3087E-5	2	11	5	14306	SCF-dependent proteasomal ubiquitin-dependent protein catabolic process	SKP1|RBX1
9057	7.3428E-6	6.5351E-5	4	503	5	14306	macromolecule catabolic process	PSMF1|FBXL7|SKP1|RBX1
10498	8.8498E-6	6.5636E-5	3	139	5	14306	proteasomal protein catabolic process	PSMF1|SKP1|RBX1
43161	8.8498E-6	6.5636E-5	3	139	5	14306	proteasomal ubiquitin-dependent protein catabolic process	PSMF1|SKP1|RBX1
44248	4.1114E-5	2.8147E-4	4	776	5	14306	cellular catabolic process	PSMF1|FBXL7|SKP1|RBX1
44267	7.6898E-5	4.8885E-4	5	2153	5	14306	cellular protein metabolic process	PSMF1|FBXW2|FBXL7|SKP1|RBX1
9056	1.1477E-4	6.8097E-4	4	1006	5	14306	catabolic process	PSMF1|FBXL7|SKP1|RBX1
51437	1.9532E-4	1.0569E-3	2	64	5	14306	positive regulation of ubiquitin-protein ligase activity involved in mitotic cell cycle	PSMF1|SKP1
19538	2.0188E-4	1.0569E-3	5	2611	5	14306	protein metabolic process	PSMF1|FBXW2|FBXL7|SKP1|RBX1
51439	2.2058E-4	1.0906E-3	2	68	5	14306	regulation of ubiquitin-protein ligase activity involved in mitotic cell cycle	PSMF1|SKP1
51443	2.3378E-4	1.0951E-3	2	70	5	14306	positive regulation of ubiquitin-protein ligase activity	PSMF1|SKP1
51351	2.5429E-4	1.1316E-3	2	73	5	14306	positive regulation of ligase activity	PSMF1|SKP1
51438	3.1316E-4	1.3272E-3	2	81	5	14306	regulation of ubiquitin-protein ligase activity	PSMF1|SKP1
51340	3.3679E-4	1.3625E-3	2	84	5	14306	regulation of ligase activity	PSMF1|SKP1
31398	4.3071E-4	1.6667E-3	2	95	5	14306	positive regulation of protein ubiquitination	PSMF1|SKP1
31396	6.9778E-4	2.5876E-3	2	121	5	14306	regulation of protein ubiquitination	PSMF1|SKP1
44260	8.8465E-4	3.1494E-3	5	3508	5	14306	cellular macromolecule metabolic process	PSMF1|FBXW2|FBXL7|SKP1|RBX1
16567	1.6913E-3	5.7434E-3	2	189	5	14306	protein ubiquitination	SKP1|RBX1
43170	1.7424E-3	5.7434E-3	5	4017	5	14306	macromolecule metabolic process	PSMF1|FBXW2|FBXL7|SKP1|RBX1
32446	2.0053E-3	6.3740E-3	2	206	5	14306	protein modification by small protein conjugation	SKP1|RBX1
45116	2.4445E-3	7.4583E-3	1	7	5	14306	protein neddylation	RBX1
31401	2.5140E-3	7.4583E-3	2	231	5	14306	positive regulation of protein modification process	PSMF1|SKP1
70647	3.0545E-3	8.7693E-3	2	255	5	14306	protein modification by small protein conjugation or removal	SKP1|RBX1
32270	3.9329E-3	1.0938E-2	2	290	5	14306	positive regulation of cellular protein metabolic process	PSMF1|SKP1
51247	4.3978E-3	1.1861E-2	2	307	5	14306	positive regulation of protein metabolic process	PSMF1|SKP1
44237	5.1564E-3	1.3498E-2	5	4990	5	14306	cellular metabolic process	PSMF1|FBXW2|FBXL7|SKP1|RBX1
31399	6.2019E-3	1.5770E-2	2	366	5	14306	regulation of protein modification process	PSMF1|SKP1
278	6.6728E-3	1.6497E-2	2	380	5	14306	mitotic cell cycle	PSMF1|SKP1
44238	6.8920E-3	1.6578E-2	5	5288	5	14306	primary metabolic process	PSMF1|FBXW2|FBXL7|SKP1|RBX1
6464	1.0263E-2	2.4037E-2	3	1526	5	14306	protein modification process	FBXW2|SKP1|RBX1
43412	1.1877E-2	2.7104E-2	3	1607	5	14306	macromolecule modification	FBXW2|SKP1|RBX1
8152	1.2527E-2	2.7873E-2	5	5959	5	14306	metabolic process	PSMF1|FBXW2|FBXL7|SKP1|RBX1
43085	1.3800E-2	2.9856E-2	2	553	5	14306	positive regulation of catalytic activity	PSMF1|SKP1
32268	1.4089E-2	2.9856E-2	2	559	5	14306	regulation of cellular protein metabolic process	PSMF1|SKP1
22402	1.5223E-2	3.1509E-2	2	582	5	14306	cell cycle process	PSMF1|SKP1
51246	1.7988E-2	3.5899E-2	2	635	5	14306	regulation of protein metabolic process	PSMF1|SKP1
44093	1.8151E-2	3.5899E-2	2	638	5	14306	positive regulation of molecular function	PSMF1|SKP1
51436	2.1485E-2	4.1335E-2	1	62	5	14306	negative regulation of ubiquitin-protein ligase activity involved in mitotic cell cycle	PSMF1
31145	2.1829E-2	4.1335E-2	1	63	5	14306	anaphase-promoting complex-dependent proteasomal ubiquitin-dependent protein catabolic process	PSMF1
51352	2.2859E-2	4.1519E-2	1	66	5	14306	negative regulation of ligase activity	PSMF1
51444	2.2859E-2	4.1519E-2	1	66	5	14306	negative regulation of ubiquitin-protein ligase activity	PSMF1
31397	2.6969E-2	4.7989E-2	1	78	5	14306	negative regulation of protein ubiquitination	PSMF1
7049	2.7499E-2	4.7989E-2	2	794	5	14306	cell cycle	PSMF1|SKP1

## Sheet: Sheet3
File created with BiNGO (c)
CLUSTER 3
ontology: namespace
curator: bingo
Selected ontology file : jar:file:C:\Users\Jose\.cytoscape\2.8\plugins\BiNGO-2.44\BiNGO.jar!/GO_Biological_Process
Selected annotation file : jar:file:C:\Users\Jose\.cytoscape\2.8\plugins\BiNGO-2.44\BiNGO.jar!/H_sapiens_default
Discarded evidence codes :
Overrepresentation
Selected statistical test : Hypergeometric test
Selected correction : Benjamini & Hochberg False Discovery Rate (FDR) correction
Selected significance level : 0.05
Testing option : Use whole annotation as reference set
The selected cluster :
EIF4A3	POLR1E	TSR2	TRMT6	RARS	BCCIP	RIOK2
No annotations were retrieved for the following entities:
GO-ID	p-value	corr p-value	x	n	X	N	Description	Genes in test set
34660	2.4306E-6	3.1841E-4	4	236	7	14306	ncRNA metabolic process	EIF4A3|TSR2|RARS|TRMT6
90304	7.1531E-6	4.6853E-4	6	1460	7	14306	nucleic acid metabolic process	EIF4A3|POLR1E|TSR2|RARS|TRMT6|BCCIP
6139	2.3501E-5	8.5215E-4	6	1786	7	14306	nucleobase	nucleoside	nucleotide and nucleic acid metabolic process	EIF4A3|POLR1E|TSR2|RARS|TRMT6|BCCIP
16070	2.6020E-5	8.5215E-4	5	966	7	14306	RNA metabolic process	EIF4A3|POLR1E|TSR2|RARS|TRMT6
44260	5.3067E-5	1.2494E-3	7	3508	7	14306	cellular macromolecule metabolic process	EIF4A3|POLR1E|TSR2|RARS|TRMT6|BCCIP|RIOK2
34641	5.7225E-5	1.2494E-3	6	2078	7	14306	cellular nitrogen compound metabolic process	EIF4A3|POLR1E|TSR2|RARS|TRMT6|BCCIP
6807	7.9096E-5	1.3314E-3	6	2196	7	14306	nitrogen compound metabolic process	EIF4A3|POLR1E|TSR2|RARS|TRMT6|BCCIP
34470	8.1305E-5	1.3314E-3	3	193	7	14306	ncRNA processing	EIF4A3|TSR2|TRMT6
10467	9.5672E-5	1.3926E-3	5	1262	7	14306	gene expression	EIF4A3|POLR1E|TSR2|RARS|TRMT6
43170	1.3710E-4	1.7961E-3	7	4017	7	14306	macromolecule metabolic process	EIF4A3|POLR1E|TSR2|RARS|TRMT6|BCCIP|RIOK2
44237	6.2645E-4	7.4604E-3	7	4990	7	14306	cellular metabolic process	EIF4A3|POLR1E|TSR2|RARS|TRMT6|BCCIP|RIOK2
6364	9.3461E-4	9.4765E-3	2	97	7	14306	rRNA processing	EIF4A3|TSR2
44238	9.4043E-4	9.4765E-3	7	5288	7	14306	primary metabolic process	EIF4A3|POLR1E|TSR2|RARS|TRMT6|BCCIP|RIOK2
16072	1.0128E-3	9.4765E-3	2	101	7	14306	rRNA metabolic process	EIF4A3|TSR2
6399	1.3789E-3	1.2014E-2	2	118	7	14306	tRNA metabolic process	RARS|TRMT6
6420	1.4673E-3	1.2014E-2	1	3	7	14306	arginyl-tRNA aminoacylation	RARS
42254	1.6957E-3	1.3067E-2	2	131	7	14306	ribosome biogenesis	EIF4A3|TSR2
6396	1.9332E-3	1.4069E-2	3	568	7	14306	RNA processing	EIF4A3|TSR2|TRMT6
8152	2.1712E-3	1.4512E-2	7	5959	7	14306	metabolic process	EIF4A3|POLR1E|TSR2|RARS|TRMT6|BCCIP|RIOK2
6417	2.2156E-3	1.4512E-2	2	150	7	14306	regulation of translation	EIF4A3|TRMT6
22613	3.7108E-3	2.3149E-2	2	195	7	14306	ribonucleoprotein complex biogenesis	EIF4A3|TSR2
10608	5.6129E-3	3.3422E-2	2	241	7	14306	posttranscriptional regulation of gene expression	EIF4A3|TRMT6
9303	8.7762E-3	4.9986E-2	1	18	7	14306	rRNA transcription	POLR1E

## Sheet: Sheet4
File created with BiNGO ©
CLUSTER 4
ontology: namespace
curator: bingo
Selected ontology file : jar:file:C:\Users\Jose\.cytoscape\2.8\plugins\BiNGO-2.44\BiNGO.jar!/GO_Biological_Process
Selected annotation file : jar:file:C:\Users\Jose\.cytoscape\2.8\plugins\BiNGO-2.44\BiNGO.jar!/H_sapiens_default
Discarded evidence codes :
Overrepresentation
Selected statistical test : Hypergeometric test
Selected correction : Benjamini & Hochberg False Discovery Rate (FDR) correction
Selected significance level : 0.05
Testing option : Use whole annotation as reference set
The selected cluster :
EIF4A3	RBM8A	EFTUD2	MAGOH	SNRNP40	RUVBL1
No annotations were retrieved for the following entities:
GO-ID	p-value	corr p-value	x	n	X	N	Description	Genes in test set
8380	1.8214E-8	1.6510E-6	5	286	6	14305	RNA splicing	EIF4A3|RBM8A|MAGOH|EFTUD2|SNRNP40
6397	2.6416E-8	1.6510E-6	5	308	6	14305	mRNA processing	EIF4A3|RBM8A|MAGOH|EFTUD2|SNRNP40
16071	6.4435E-8	2.6848E-6	5	368	6	14305	mRNA metabolic process	EIF4A3|RBM8A|MAGOH|EFTUD2|SNRNP40
184	1.6576E-7	5.1801E-6	3	30	6	14305	nuclear-transcribed mRNA catabolic process	nonsense-mediated decay	EIF4A3|RBM8A|MAGOH
956	4.3448E-7	1.0862E-5	3	41	6	14305	nuclear-transcribed mRNA catabolic process	EIF4A3|RBM8A|MAGOH
6396	5.5820E-7	1.1629E-5	5	567	6	14305	RNA processing	EIF4A3|RBM8A|MAGOH|EFTUD2|SNRNP40
6402	7.4997E-7	1.3392E-5	3	49	6	14305	mRNA catabolic process	EIF4A3|RBM8A|MAGOH
90304	1.1153E-6	1.7426E-5	6	1459	6	14305	nucleic acid metabolic process	EIF4A3|RBM8A|MAGOH|EFTUD2|SNRNP40|RUVBL1
6401	2.4189E-6	3.3596E-5	3	72	6	14305	RNA catabolic process	EIF4A3|RBM8A|MAGOH
6139	3.7472E-6	4.6840E-5	6	1785	6	14305	nucleobase	nucleoside	nucleotide and nucleic acid metabolic process	EIF4A3|RBM8A|MAGOH|EFTUD2|SNRNP40|RUVBL1
51028	4.7513E-6	5.3993E-5	3	90	6	14305	mRNA transport	EIF4A3|RBM8A|MAGOH
50657	6.5294E-6	5.8299E-5	3	100	6	14305	nucleic acid transport	EIF4A3|RBM8A|MAGOH
51236	6.5294E-6	5.8299E-5	3	100	6	14305	establishment of RNA localization	EIF4A3|RBM8A|MAGOH
50658	6.5294E-6	5.8299E-5	3	100	6	14305	RNA transport	EIF4A3|RBM8A|MAGOH
6403	7.1379E-6	5.9482E-5	3	103	6	14305	RNA localization	EIF4A3|RBM8A|MAGOH
16070	7.8369E-6	6.1226E-5	5	965	6	14305	RNA metabolic process	EIF4A3|RBM8A|MAGOH|EFTUD2|SNRNP40
34641	9.3113E-6	6.8465E-5	6	2077	6	14305	cellular nitrogen compound metabolic process	EIF4A3|RBM8A|MAGOH|EFTUD2|SNRNP40|RUVBL1
15931	9.9464E-6	6.9072E-5	3	115	6	14305	nucleobase	nucleoside	nucleotide and nucleic acid transport	EIF4A3|RBM8A|MAGOH
6807	1.2977E-5	8.5373E-5	6	2195	6	14305	nitrogen compound metabolic process	EIF4A3|RBM8A|MAGOH|EFTUD2|SNRNP40|RUVBL1
6417	2.2086E-5	1.3804E-4	3	150	6	14305	regulation of translation	EIF4A3|RBM8A|MAGOH
10467	2.9385E-5	1.7491E-4	5	1261	6	14305	gene expression	EIF4A3|RBM8A|MAGOH|EFTUD2|SNRNP40
10608	9.0977E-5	5.1692E-4	3	241	6	14305	posttranscriptional regulation of gene expression	EIF4A3|RBM8A|MAGOH
44260	2.1641E-4	1.1762E-3	6	3507	6	14305	cellular macromolecule metabolic process	EIF4A3|RBM8A|MAGOH|EFTUD2|SNRNP40|RUVBL1
43170	4.8828E-4	2.5431E-3	6	4016	6	14305	macromolecule metabolic process	EIF4A3|RBM8A|MAGOH|EFTUD2|SNRNP40|RUVBL1
44265	5.4298E-4	2.7149E-3	3	441	6	14305	cellular macromolecule catabolic process	EIF4A3|RBM8A|MAGOH
9057	7.9838E-4	3.8384E-3	3	503	6	14305	macromolecule catabolic process	EIF4A3|RBM8A|MAGOH
32268	1.0866E-3	5.0307E-3	3	559	6	14305	regulation of cellular protein metabolic process	EIF4A3|RBM8A|MAGOH
51246	1.5744E-3	7.0285E-3	3	635	6	14305	regulation of protein metabolic process	EIF4A3|RBM8A|MAGOH
44237	1.7960E-3	7.7413E-3	6	4989	6	14305	cellular metabolic process	EIF4A3|RBM8A|MAGOH|EFTUD2|SNRNP40|RUVBL1
44238	2.5442E-3	1.0601E-2	6	5287	6	14305	primary metabolic process	EIF4A3|RBM8A|MAGOH|EFTUD2|SNRNP40|RUVBL1
44248	2.8106E-3	1.1333E-2	3	776	6	14305	cellular catabolic process	EIF4A3|RBM8A|MAGOH
43968	5.0235E-3	1.9623E-2	1	12	6	14305	histone H2A acetylation	RUVBL1
8152	5.2124E-3	1.9744E-2	6	5958	6	14305	metabolic process	EIF4A3|RBM8A|MAGOH|EFTUD2|SNRNP40|RUVBL1
9056	5.9023E-3	2.1700E-2	3	1006	6	14305	catabolic process	EIF4A3|RBM8A|MAGOH
33036	7.7958E-3	2.7842E-2	3	1110	6	14305	macromolecule localization	EIF4A3|RBM8A|MAGOH
43967	1.0442E-2	3.6257E-2	1	25	6	14305	histone H4 acetylation	RUVBL1
45727	1.3349E-2	4.5099E-2	1	32	6	14305	positive regulation of translation	EIF4A3
