# Supplementary material for: A Network Flow Approach to Predict Protein Targets and Flavonoid Backbones to Treat Respiratory Syncytial Virus Infection
Source: Biomed Res Int. 2015 Mar 22;2015:301635. doi: 10.1155/2015/301635 (PMC4386546; doi:10.1155/2015/301635)
Supplement: Supplementary file 1 — Supplementary figure 1: All PPI networks obtained in this work. PPI network was obtained from microarrays data of PHBE cells infected with RSV, and flavonoid compounds, as initial input of STITCH software. Supplementary Table 1: All gene ontologies obtanied from major PPI network through. Supplementary Table 2: CentiScape Analysis. (a) Degree, betweeness and closeness centrality scores of each node in RSV CP-PPI network. (b) Hub (H) and bottlenecks (B) nodes are showed with their closeness values. [file 301635.f1.zip › Suppl Table 2.xls]

## Sheet: Plan1
Supplementary table 2. CentiScape Analysis. (A) Degree, betweeness and closeness centrality scores of each node in RSV CP-PPI network are plotted in tables below. (B) Hub (H) and bottlenecks (B) nodes are showed with their closeness values.
A	RSV PPI NETWORK				B	H-B nodes
ID	CentiScape Betweeness	CentiScape Closeness	CentiScape Degree		ID	CentiScape Betweeness	CentiScape Degree	CentiScape Closeness
apigenin	110	0.00395257	2		AURKB	520.162	6	0.00526316
AURKB	520.162	0.00526316	6		BCL2	1465	7	0.005
BBC3	0	0.00392157	1		BIRC5	268	8	0.00478469
BCCIP	139.495	0.0049505	5		EIF4A3	1310.2	10	0.0060241
BCL2	1465	0.005	7		EXO1	225.2	7	0.00483092
BIRC5	268	0.00478469	8		EXOSC8	234.667	4	0.00456621
C9orf100	0	0.00380228	2		KPNA2	559.417	8	0.00526316
CALM2	0	0.00380228	2		PIM1	221	4	0.00340136
CALM3	0	0.00380228	2		POLR1E	480.264	9	0.00510204
CASP6	218	0.00333333	3		RBX1	1503.34	6	0.00564972
CDCA8	52	0.00473934	6		TSR2	307.4	5	0.0041841
CHD8	0	0.00381679	2
DIS3L	0	0.00373134	2
DSP	0	0.0028169	1
EFTUD2	90.3881	0.00471698	4
EIF4A3	1310.2	0.0060241	10
ETAA1	0	0.00301205	1
EXO1	225.2	0.00483092	7
EXOSC10	28.1095	0.00381679	3
EXOSC8	234.667	0.00456621	4
FBXL7	0	0.004329	2
FBXW2	0	0.004329	2
genistein	0	0.00324675	1
KIF2C	0	0.00471698	5
KPNA2	559.417	0.00526316	8
MAGOH	931.838	0.00571429	3
MED4	0	0.00283286	1
myricetin	0	0.00286533	1
NCOR2	110	0.0033557	2
NSUN5P2	0	0.00398406	1
NXF3	0	0.00452489	1
PIF1	114.2	0.00396825	2
PIM1	221	0.00340136	4
PIN1	366	0.00408163	3
POLR1E	480.264	0.00510204	9
PPP3R1	110	0.00395257	2
PSMF1	515.01	0.00502513	3
quercetin	150	0.00401606	2
RAD52	55.4	0.0034965	2
RARS	0	0.00480769	3
RBM8A	107.805	0.00518135	4
RBX1	1503.34	0.00564972	6
resveratrol	318	0.00401606	2
RIOK2	101.095	0.0049505	5
RRM2B	0	0.00416667	2
RUVBL1	162.417	0.00471698	4
RUVBL2	48.7476	0.00389105	4
SATB1	0	0.0028169	1
SHOC2	0	0.00324675	1
SKP1	28.5048	0.0046729	4
SMC6	154	0.00361011	3
SNRNP40	2.33333	0.00416667	3
TMEM177	0	0.00398406	1
tricetin	0	0.00286533	1
TRMT6	0	0.004	2
TSPYL2	0	0.00340136	1
TSR2	307.4	0.0041841	5
Mean value	193.123	0.00416172	3.22807
