# Supplementary figures and images for: A Network Flow Approach to Predict Protein Targets and Flavonoid Backbones to Treat Respiratory Syncytial Virus Infection
Source: Hindawi journal article supplement (doi:10.1155/2015/301635), 2015-01-01

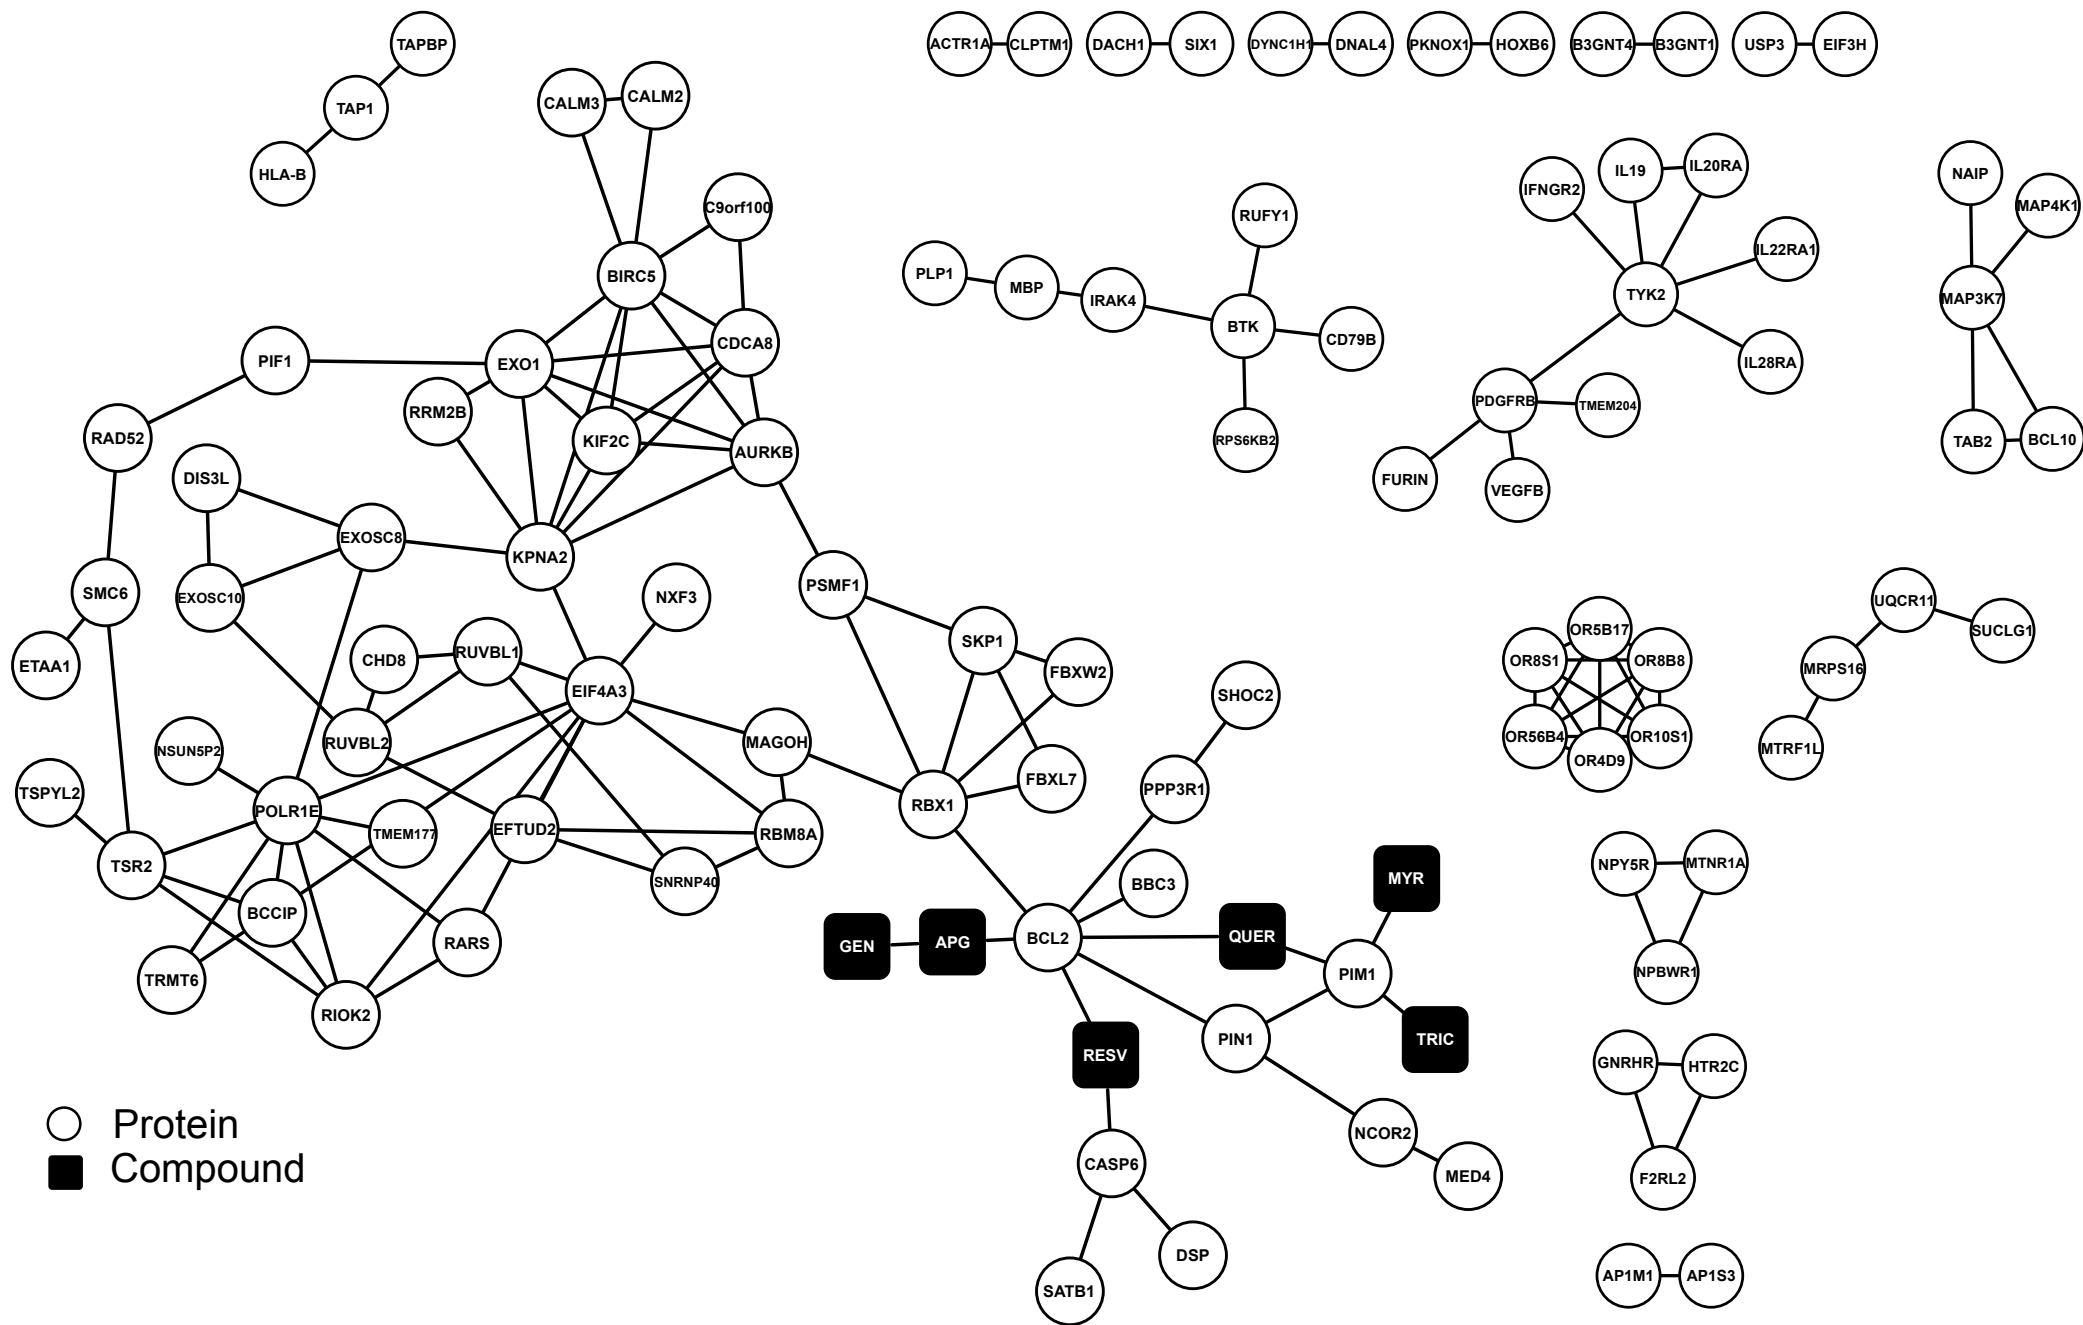

Supplement: f1 [file 301635.f1.zip]
